# Supplementary material
Source: PubMed Central journal article supplement (PMC11626273)
Supplement: ajcr0014-5251-f9.pdf [file ajcr0014-5251-f9.pdf]

## The effect of Sotorasib on bladder cancer

**Supplementary Table 1.** Chemicals and primary antibodies used in this study

| Name           | Supplier                  | Cat no.      |
|----------------|---------------------------|--------------|
| Sotorasib      | MCE                       | 2296729-00-3 |
| CHX            | Selleck                   | S7418        |
| MG132          | Selleck                   | S2619        |
| CQ             | MedChemExpress            | HY-17589AS   |
| Selumetinib    | MedChemExpress            | HY-50706     |
| TBHQ           | MCE                       | 1948-33-0    |
| KRAS           | Abcam                     | 275876       |
| cRAF           | SAB                       | 35408        |
| p-c-RAF        | Cell Signaling Technology | 9421         |
| p-ERK          | Cell Signaling Technology | 4370         |
| ERK            | Cell Signaling Technology | 9102         |
| p-AKT          | Cell Signaling Technology | 4060         |
| AKT            | Cell Signaling Technology | 9272         |
| p-mTOR         | Cell Signaling Technology | 5536         |
| mTOR           | Proteintech               | 20657        |
| GLUT1          | Santa                     | 377228       |
| PKM2           | Cell Signaling Technology | 4053         |
| LDHA           | Santa                     | 137243       |
| TXNIP          | Cell Signaling Technology | 14715        |
| $\beta$ -actin | SAB                       | 52901        |
| Ubiquitin      | R&D Systems               | MAB701       |

**Supplementary Table 2.** Primers used in this study

| Gene          | Forward Primer         | Reverse Primer         |
|---------------|------------------------|------------------------|
| <i>SLC2A1</i> | GTCTGGCATCAACGCTGTCT   | AACAGCGACACGACAGTGAA   |
| <i>PKM2</i>   | CATGCAGCACCTGATAGCTC   | CTTGAGGCTCGCACAAGTTC   |
| <i>LDHA</i>   | AGGAACAGTGAAAGAGTGCAG  | ACATGCACAACCTCCACCTA   |
| <i>TXNIP</i>  | TGACCTGCCCTGGTAATTG    | ATGCAGGGATCCACCTCAGTA  |
| <i>ACTB</i>   | CACCATTGGCAATGAGCGGTTC | AGGTCTTTGCGGATGTCCACGT |

**Supplementary Table 3.** The targeting oligos of TXNIP

| siRNA                   | 5'-3'               |
|-------------------------|---------------------|
| genOFFTM st-h-TXNIP_001 | CAACATCCTTCGAGTTGAA |
| si-h-TXNIP_005          | TGATCATGAGACCTGGAAA |
